# Supplementary material for: Halogen-bearing metasomatizing melt preserved in high-pressure (HP) eclogites of Pfaffenberg, Bohemian Massif
Source: Copernicus journal article supplement (doi:10.5194/ejm-36-279-2024), 2024-03-15
Supplement: Supplementary file 1 [file ejm-36-279-2024-supplement.pdf]

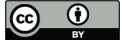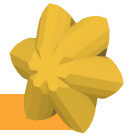

*Supplement of*

## **Halogen-bearing metasomatizing melt preserved in high-pressure (HP) eclogites of Pfaffenberg, Bohemian Massif**

**Alessia Borghini et al.**

*Correspondence to:* Alessia Borghini (borghini@agh.edu.pl)

The copyright of individual parts of the supplement might differ from the article licence.

SUPPLEMENTARY MATERIAL

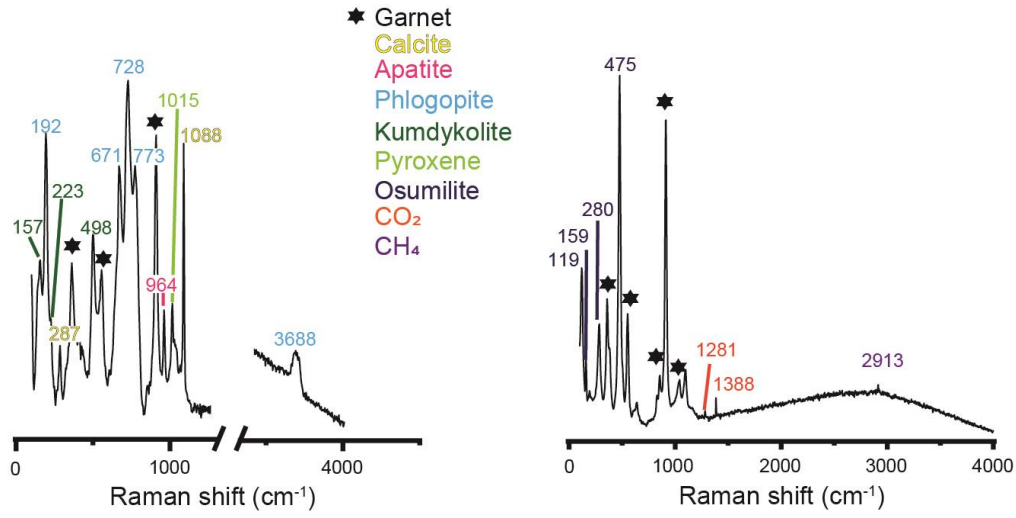

Figure S1: Raman spectra of nanogranitoids containing mineral phases and fluids.

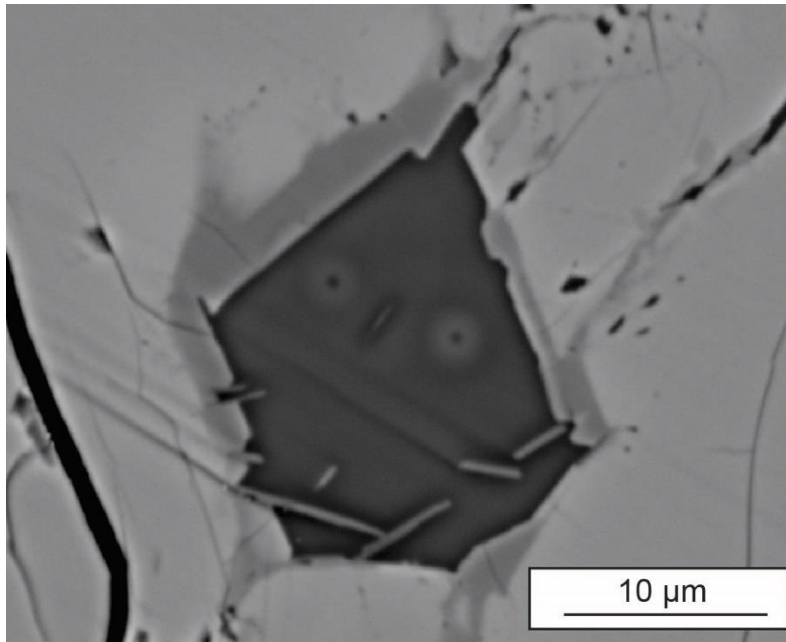

Figure S2: BSE images of re-homogenized inclusions at 1000°C and 2.2 GPa containing corundum needles

| EXPERIMENTAL PARAMETERS |                  |                |              |                                | RESULTS                       |               |                                                                                                 |
|-------------------------|------------------|----------------|--------------|--------------------------------|-------------------------------|---------------|-------------------------------------------------------------------------------------------------|
| Experiment Name         | Temperature (°C) | Pressure (GPa) | Duration (h) | Materials in the capsule       | Complete re-homogenization    | Decrepitation | Melt-host interaction                                                                           |
| PF 5.1                  | 1000             | 2.2            | 24           | Chips + quartz powder          | X                             | -             | X<br>Growth of new Grt + Crd needle                                                             |
| PF 2.5                  | 975              | 2.7            | 24           | Chips + quartz powder          | X (with included Px sometime) | -             | X<br>(some inclusions show a thin reaction rim between them and the Grt and they were excluded) |
| PF 5.2                  | 975              | 3              | 24           | 4 chips of Grt + quartz powder | X                             | -             | -                                                                                               |

**Table S1: Summary of the experimental parameters and the results of the different re-homogenization experiments performed.**

| Locality                       | Pfaffenberg   | Rubinberg             |               |               |               | Klatschmühle |              |               |              |
|--------------------------------|---------------|-----------------------|---------------|---------------|---------------|--------------|--------------|---------------|--------------|
| Sample type                    | Eclogites     |                       |               |               |               |              |              |               |              |
| Reference                      | This study    | Borghini et al., 2020 |               |               |               |              |              |               |              |
| Sample name                    | PF 1          | RUB 1                 | RUB 6         | RUB 11        | KLA1          | KLA 1.2-1    | KLA 2.2      | RUB Average   | KLA Average  |
| <b>wt %</b>                    |               |                       |               |               |               |              |              |               |              |
| SiO <sub>2</sub>               | 44.4          | 43.40                 | 43.59         | 44.81         | 48.10         | 46.74        | 43.38        | 43.93         | 46.07        |
| TiO <sub>2</sub>               | 1.34          | 2.35                  | 1.07          | 1.29          | 0.67          | 0.69         | 0.94         | 1.57          | 0.77         |
| Al <sub>2</sub> O <sub>3</sub> | 16.5          | 15.20                 | 15.85         | 15.65         | 16.30         | 15.41        | 17.50        | 15.57         | 16.40        |
| Fe <sub>2</sub> O <sub>3</sub> | 0             | 0                     | 0             | 0             | 0             | 0            | 0            | 0.00          | 0.00         |
| FeO                            | 12.6          | 15.80                 | 12.82         | 13.87         | 10.1          | 11.22        | 13.53        | 14.16         | 11.62        |
| MnO                            | 0.23          | 0.26                  | 0.23          | 0.22          | 0.15          | 0.17         | 0.22         | 0.24          | 0.18         |
| MgO                            | 9.19          | 9.23                  | 14.04         | 10.41         | 10.3          | 11.14        | 8.89         | 11.23         | 10.11        |
| CaO                            | 12.6          | 12.2                  | 11.34         | 12.61         | 11.3          | 11.61        | 12.76        | 12.05         | 11.89        |
| Na <sub>2</sub> O              | 2.15          | 1.82                  | 1.14          | 1.82          | 2.86          | 2.03         | 1.76         | 1.59          | 2.22         |
| K <sub>2</sub> O               | 0.25          | 0.04                  | 0.02          | 0.15          | 0.52          | 0.53         | 0.21         | 0.07          | 0.42         |
| P <sub>2</sub> O <sub>5</sub>  | 1.25          | 0.08                  | 0.19          | 0.08          | 0.05          | 0.08         | 0.36         | 0.12          | 0.16         |
| LOI                            | 0.14          | 0.04                  | 0.34          | -0.03         | 0.24          | 0.78         | -0.16        | 0.12          | 0.29         |
| <b>TOTAL</b>                   | <b>100.51</b> | <b>100.38</b>         | <b>100.29</b> | <b>100.91</b> | <b>100.35</b> | <b>99.62</b> | <b>99.55</b> | <b>100.53</b> | <b>99.84</b> |
| <b>Mg#</b>                     | <b>57</b>     | <b>51</b>             | <b>66</b>     | <b>57</b>     | <b>64</b>     | <b>64</b>    | <b>54</b>    | <b>58</b>     | <b>62</b>    |
| <b>ppm</b>                     |               |                       |               |               |               |              |              |               |              |
| Cr                             | 300           | 200                   | 400           | 500           | 500           | 700          | 300          | 367           | 500          |
| Ni                             | 31            | 80                    | 106           | 89            | 90            | 107          | 27           | 91            | 74           |
| Rb                             | 11            | 14                    | 2             | 9             | 18            | 31           | 17           | 8             | 22           |
| Cs                             | 11            | 49                    | 4             | 12            | 11            | 37           | 14           | 22            | 21           |
| Ba                             | 78            | 99                    | 92            | 225           | 186           | 184          | 55           | 139           | 142          |
| Th                             | 3.0           | 0.50                  | 2.2           | 1.8           | 0.50          | 0.30         | 1.0          | 2             | 0.60         |
| U                              | 0.9           | 0.80                  | 1.3           | 1.0           | 0.20          | 0.10         | 0.30         | 1             | 0.20         |
| Nb                             | 11            | 9.9                   | 19            | 4.3           | 4.0           | 4.9          | 11           | 11            | 6.5          |
| Ta                             | 0.70          | 0.70                  | 1.5           | 0.30          | 0.40          | 0.60         | 1.1          | 1             | 0.70         |
| La                             | 36            | 5.8                   | 9.9           | 12            | 6.0           | 6.4          | 17           | 9             | 10           |
| Ce                             | 91            | 14                    | 22            | 27            | 14            | 18           | 34           | 21            | 22           |
| Pb                             | 1.8           | 1.1                   | 7.9           | 3.2           | 1.2           | 1.8          | 1.8          | 4             | 1.6          |
| Pr                             | 13            | 2.2                   | 3.0           | 3.4           | 2.2           | 2.7          | 4.1          | 3             | 3.0          |
| P                              | 12500         | 800                   | 1900          | 800           | 500           | 800          | 3600         | 1167          | 1633         |
| Sr                             | 141           | 62                    | 117           | 115           | 185           | 142          | 131          | 98            | 153          |
| Nd                             | 56            | 11                    | 13            | 15            | 10            | 13           | 17           | 13            | 14           |
| Zr                             | 138           | 74                    | 62            | 71            | 73            | 73           | 49           | 69            | 65           |
| Hf                             | 4.0           | 2.3                   | 2             | 2             | 2.3           | 2.5          | 1.6          | 2.1           | 2.1          |
| Sm                             | 11            | 3.3                   | 4.0           | 4.0           | 3.2           | 3.6          | 4.3          | 3.8           | 3.7          |
| Eu                             | 2.2           | 1.0                   | 1.1           | 1.2           | 1.0           | 1.1          | 1.2          | 1.1           | 1.1          |
| Gd                             | 9.0           | 4.4                   | 5.1           | 5.2           | 3.6           | 4.3          | 4.8          | 4.9           | 4.2          |
| Tb                             | 1.3           | 0.87                  | 0.91          | 0.91          | 0.56          | 0.66         | 0.77         | 0.90          | 0.66         |
| Dy                             | 7.0           | 5.8                   | 5.9           | 6.1           | 3.1           | 3.7          | 4.4          | 5.9           | 3.7          |
| Ti                             | 13400         | 23500                 | 10700         | 12900         | 6700          | 6900         | 9400         | 15700         | 7667         |
| Y                              | 37            | 37                    | 33            | 33            | 16            | 19           | 21           | 34            | 19           |
| Ho                             | 1.4           | 1.5                   | 1.2           | 1.3           | 0.56          | 0.72         | 0.89         | 1.3           | 0.72         |
| Er                             | 3.9           | 4.6                   | 3.5           | 4.1           | 1.5           | 2.0          | 2.2          | 4.1           | 1.9          |
| Tm                             | 0.54          | 0.72                  | 0.47          | 0.55          | 0.20          | 0.27         | 0.29         | 0.58          | 0.25         |
| Yb                             | 3.4           | 4.7                   | 2.9           | 3.8           | 1.2           | 1.5          | 1.8          | 3.8           | 1.5          |
| Lu                             | 0.51          | 0.71                  | 0.41          | 0.59          | 0.18          | 0.23         | 0.25         | 0.57          | 0.22         |
| Li                             | n.d.          | n.d.                  | n.d.          | n.d.          | n.d.          | n.d.         | n.d.         | n.d.          | n.d.         |
| B                              | n.d.          | n.d.                  | n.d.          | n.d.          | n.d.          | n.d.         | n.d.         | n.d.          | n.d.         |

n.d. = not determined

**Table S2: Whole rock major and trace element composition of Pfaffenberg eclogites compared with the nearby eclogites of Rubinberg and Klatschmühle (Borghini et al., 2020) (Mg# =  $[\text{molar Mg} / (\text{Mg} + \text{Fe}^{2+}_{\text{tot}}) \times 100]$ ).**



## REFERENCES.

- Borghini, A., Ferrero, S., Brien, P.J.O., Günter, C., Ziemann, M.A., O'Brien, P.J., Laurent, O., Günter, C., and Ziemann, M.A., 2020, Cryptic metasomatic agent measured in situ in Variscan mantle rocks: Melt inclusions in garnet of eclogite, Granulitgebirge, Germany: *Journal of Metamorphic Geology*, v. 38, p. 207–234, doi:10.1111/jmg.12519.
